# Supplementary material for: Subtypes of Type 2 Diabetes and Prediabetes: Mortality and Excess Life Lost in South Asians
Source: Research Square preprint supplement (doi:10.21203/rs.3.rs-6819284/v1), 2025-06-23
Supplement: Supplementary file 1 [file 98a40516ec5e8bc21cb00322.docx]

**ESM Table-1:** Baseline characteristics of participants in the study cohort categorized by Prediabetes and T2D status.

|  | **Normal glucose tolerance**  **(n=6405)** | **Prediabetes (n=4992)** | **T2D**  **(n=2639)** |
| --- | --- | --- | --- |
| Age, Years | 37.2 (11.5) | 43.5 (12.4) | 51.5 (12.0) |
| Sex (Male), % | 3014 (47.1) | 2218 (44.4) | 1265 (47.9) |
| BMI (Kg/m2) | 23.9 (4.6) | 26.05 (4.9) | 28.15 (5.1) |
| Blood pressure, mmHg  Systolic  Diastolic | 118.6 (17.4)  84.7 (11.1) | 123.52 (18.8)  82.45 (11.4) | 131.81 (20.5)  85.76 (11.8) |
| Family history of T2D | 1511 (23.6) | 1065 (21.3) | 768 (29.1) |
| Self-reported CVD, % | 60 (0.9) | 119 (2.4) | 187 (7.1) |
| Fasting plasma glucose, mg/dl | 89.1 (6.4) | 99.6 (9.1) | 148.5 (59.6) |
| HbA1c, % | 5.3 (0.3) | 5.83 (0.4) | 7.76 (1.8) |
| Lipid profile, mg/dl  Total cholesterol  Triglycerides  HDL-Cholesterol | 171.2 (35.4)  102.0 [75.3, 142.8]  43.7 (11.3) | 183.1 (38.4)  123.0 [93.0, 170.0]  44.09 (11.5) | 189.6 (41.7)  149.0 [108.6, 210.0]  43.2 (12.0) |
| Surrogate insulin measures  HOMA2-B  HOMA2-IR | 90.2 [69.6, 116.1]  1.05 (0.6) | 89.4 [68.1, 117.0]  1.43 (0.8) | 64.4 [39.3, 96.7]  2.1 (1.4) |

Continuous variables are presented as means ± SD or median (IQR).

**ESM Table-2:** Risk of Premature All-Cause and cardiovascular disease mortality by Type 2 Diabetes and Prediabetes Subtypes*

| **Outcome** | **NGT**  **N=6405** | **Type 2 Diabetes (n=2639)** | | | **Prediabetes (n=4992)** | |
| --- | --- | --- | --- | --- | --- | --- |
| **SIDD**  **N=605** | **MIDD**  **N=1439** | **SIRD**  **N=595** | **IDPD**  **N=3294** | **IRPD**  **N=1698** |
| **Premature All-cause mortality** | | | | | | |
| HR [95% CI]^a | Ref | 4.17 [2.90, 6.02] | 1.39 [0.98, 1.97] | 1.70 [1.12, 2.59] | 1.38 [1.05, 1.81] | 0.83 [0.54, 1.26] |
| HR [95% CI]^b | Ref | 5.62 [3.79, 8.34] | 1.87 [1.29, 2.69] | 2.36 [1.50, 3.70] | 1.56 [1.17, 2.08] | 1.02 [0.66, 1.56] |
| **Premature CVD mortality** | | | | | | |
| HR [95% CI]^a | Ref | 8.31 [4.76, 14.54] | 1.85 [1.11, 3.08] | 2.73 [1.52, 4.88] | 1.54 [0.94, 2.52] | 0.75 [0.38, 1.45] |
| HR [95% CI]^b | Ref | 6.85 [3.65, 12.82] | 1.61 [0.94, 2.77] | 2.26 [1.20, 4.25] | 1.47 [0.88, 2.45] | 0.68 [0.34, 1.33] |

*Premature all-cause and cardiovascular disease mortality is defined as death that occurs before 70 years.

^ a. Adjusted for age (modeled using restricted cubic splines with 4 degrees of freedom), sex (Male | Female); b. further adjusted for cohort (CARRS1 | CARRS2), city (Delhi | Chennai), tobacco consumption (Yes | No), CVD medical history (Yes | No), systolic blood pressure, and total cholesterol at baseline.

HR: Hazard Ratio; SIDD: Severe Insulin Deficient Diabetes; MIDD: Mild Insulin Deficient Diabetes; SIRD: Severe Insulin Resistant Diabetes; IDPD: Insulin Deficient Prediabetes; IRPD: Insulin Resistant Prediabetes;

**ESM Table-3:** Association between standard T2D and prediabetes status, and each individual variable included in subtyping and the risk of all-cause mortality

|  | HR [95% CI] | Concordance | Loglikelihood | AIC* | LRT |
| --- | --- | --- | --- | --- | --- |
| T2D / prediabetes subtypes   - SIDD - MIDD - SIRD - IDPP - IRPP | 3.34 [2.39, 4.68]  1.39 [1.05, 1.84]  1.67 [1.15, 2.41]  1.32 [1.03, 1.68]  0.84 [0.59, 1.21] | 0.810 | -10069 | 20171 | <0.0001 |
| Glycemic status   - Prediabetes - T2D | 1.17 [0.93, 1.48]  1.87 [1.44, 2.42] | 0.803 | -10113 | 20502 |

*AIC- Akaike information criterion; HR: hazard ratio; LRT: Likelihood Ratio Test.

^ Adjusted for age (modeled using restricted cubic splines with 4 degrees of freedom), sex (Male | Female), cohort (CARRS1 | CARRS2), city (Delhi | Chennai), tobacco consumption (Yes | No), CVD medical history (Yes | No), systolic blood pressure, and total cholesterol at baseline.

SIDD: Severe Insulin Deficient Diabetes; MIDD: Mild Insulin Deficient Diabetes; SIRD: Severe Insulin Resistant Diabetes; IDPD: Insulin Deficient Prediabetes; IRPD: Insulin Resistant Prediabetes;

**ESM - Figure-1:** Study flow

Total: 21862

CARRS-1 (n=12,271); Baseline: 2010-2012

CARRS-2 (n=9,591); Baseline: 2014-2016

Normal glucose tolerance (n= 6,405)

Prediabetes

(n=7,648)

Type 2 Diabetes (n=5,371)

Final sample included for the subtyping (n=4,992)

Final sample included for the subtyping (n=2,639)

Missing information on clustering variables:

(n=2,656)

Missing information on clustering variables:

(n=2,732)

IRPD

(n=1,698)

IDPD (n=3,294)

SIRD

(n=595)

MIDD

(n=1,439)

SIDD

(n=605)

Glycemic status information not available (n= 2,438)

CARRS-1 (n=10,316); CARRS-2 (n=9,108)

IRPD: Insulin resistant prediabetes phenotype; IDPD: insulin deficient prediabetes phenotype; SIRD: severe insulin resistant diabetes; MIDD: mild insulin deficient diabetes; SIDD: severe insulin deficient diabetes phenotype.

**ESM Figure-2:** Baseline T2D and Prediabetes subtypes distribution by sex

2A: T2D subtypes


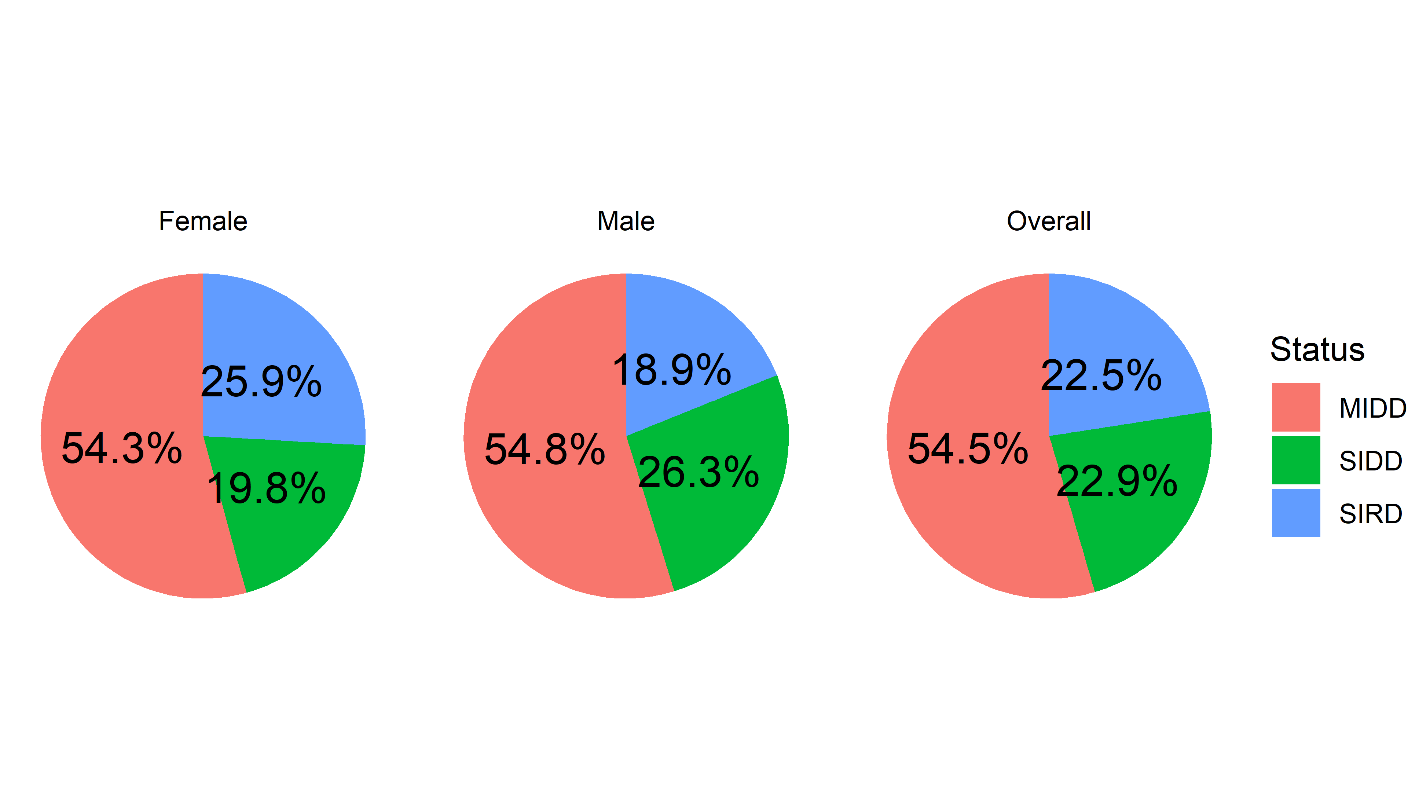


2B: Prediabetes subtypes


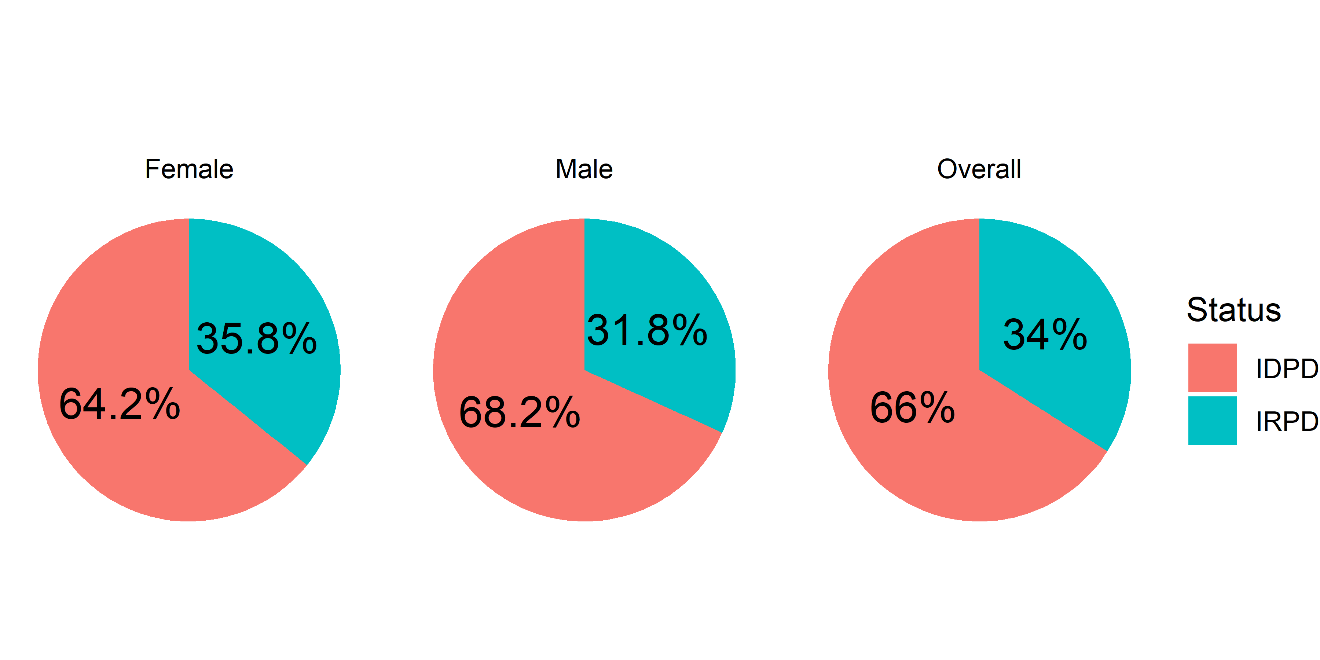


SIDD: severe insulin deficient diabetes phenotype; MIDD: mild insulin deficient diabetes; SIRD: severe insulin resistant diabetes.

IRPD: Insulin resistant prediabetes phenotype; IDPD: insulin deficient prediabetes phenotype.

**ESM Figure-2:** Distribution of glycemic categories by prediabetes phenotypes


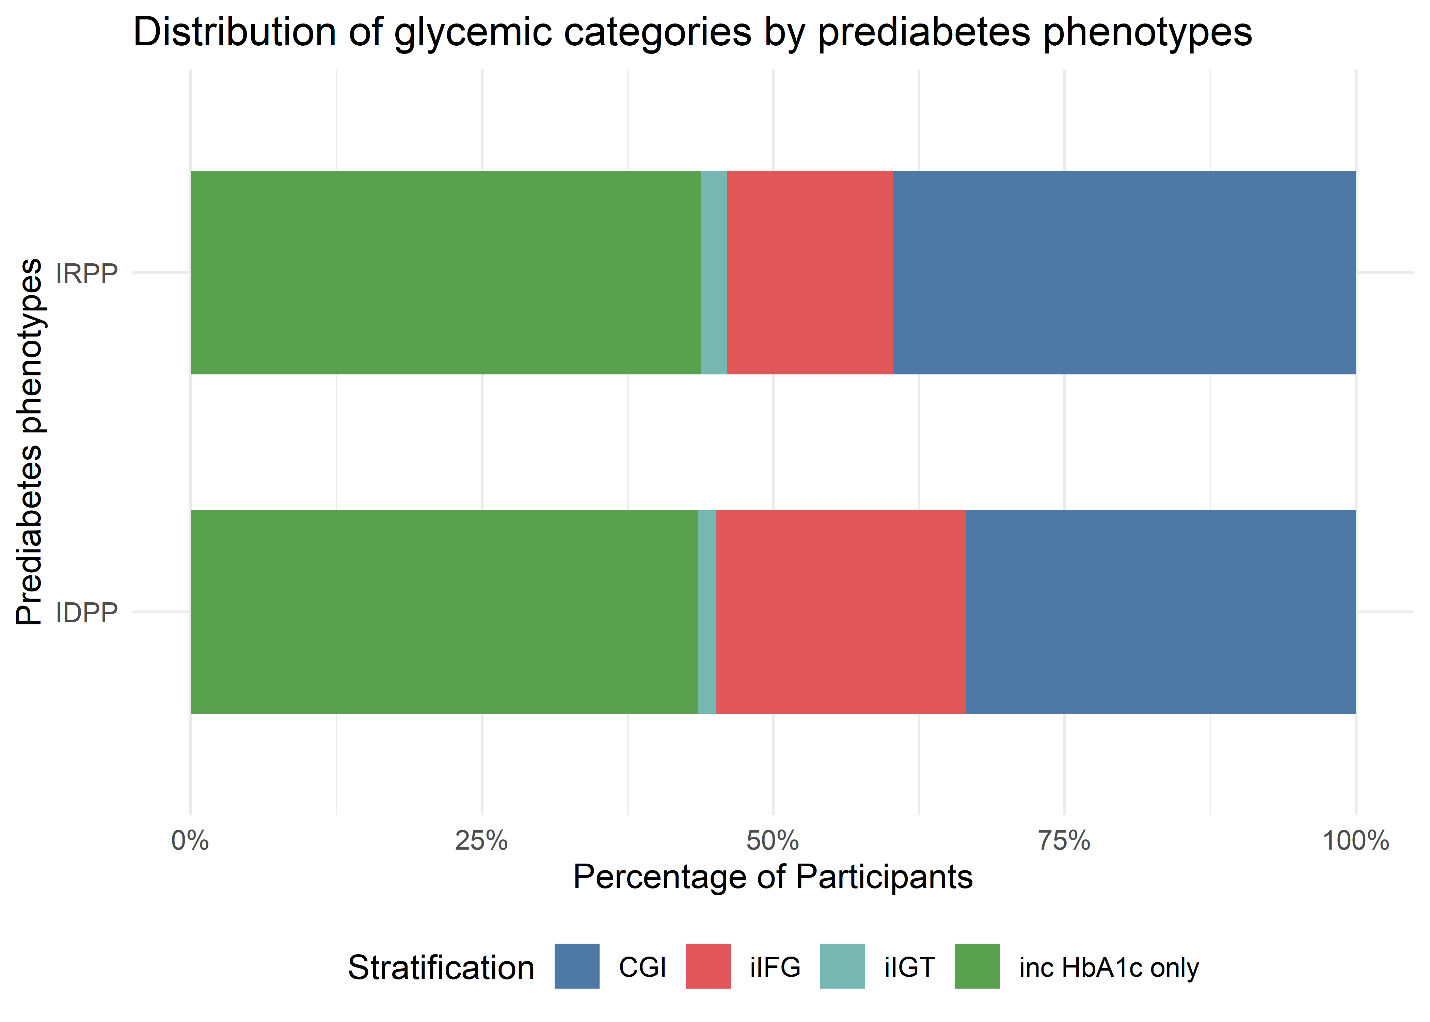


IDPD: Insulin Deficient Prediabetes; IRPD: Insulin Resistant Prediabetes

**Isolated Impaired Fasting Glucose (iIFG):** FPG 100–125 mg/dL (5.6–6.9 mmol/L), 2-h PG <140 mg/dL (7.8 mmol/L), and HbA1c <5.7% (39 mmol/mol);
**Isolated Impaired Glucose Tolerance (iIGT):** FPG <100 mg/dL (5.6 mmol/L), 2-h PG 140–199 mg/dL (7.8–11.0 mmol/L), and HbA1c <5.7% (39 mmol/mol);
**Combined Glucose Intolerance (CGI):** FPG 100–125 mg/dL (5.6–6.9 mmol/L), 2-h PG 140–199 mg/dL (7.8–11.0 mmol/L), and/or HbA1c 5.7–6.4% (39–46 mmol/mol);
**Increased HbA1c Levels (incHbA1c):** FPG <100 mg/dL (5.6 mmol/L), 2-h PG <140 mg/dL (7.8 mmol/L), and HbA1c 5.7–6.4% (39–46 mmol/mol).
